# Supplementary material for: LncRNA-RMRP promotes carcinogenesis by acting as a miR-206 sponge and is used as a novel biomarker for gastric cancer
Source: PubMed Central journal article supplement (PMC5122351; doi:10.18632/oncotarget.9336), 2016-05-12
Supplement: oncotarget-07-37812-s001.pdf [file oncotarget-07-37812-s001.pdf]

# LncRNA-RMRP promotes carcinogenesis by acting as a miR-206 sponge and is used as a novel biomarker for gastric cancer

## Supplementary Materials

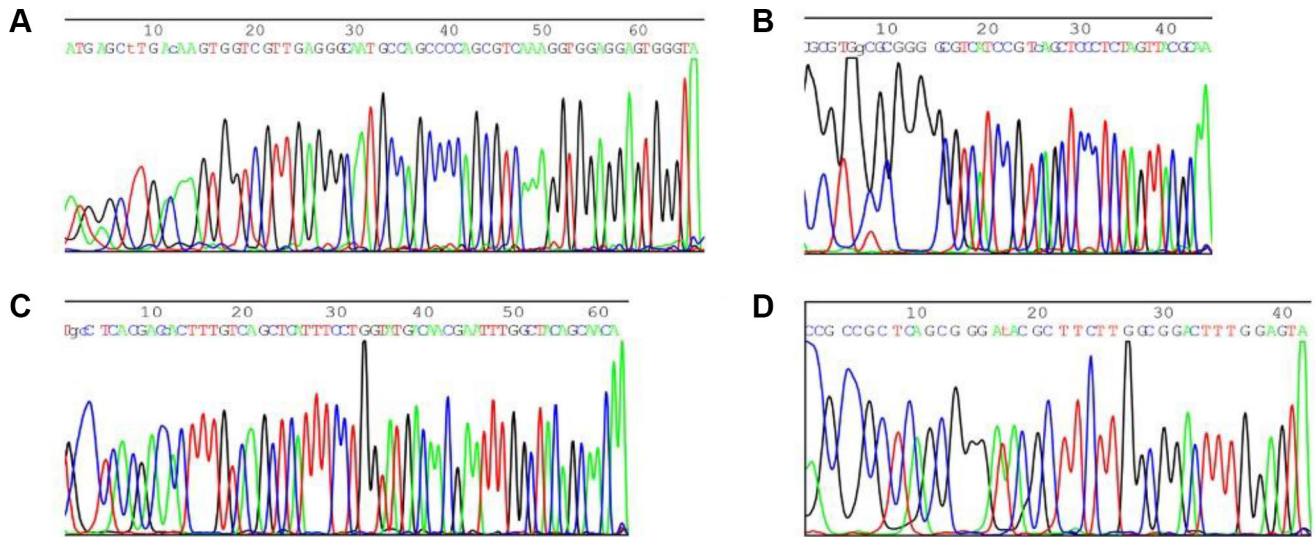

**Supplementary Figure S1: DNA sequencing results of RMRP and glyceraldehyde-3-phosphate dehydrogenase (GAPDH).** The qRT-PCR products of plasma and gastric juice RMRP and GAPDH were sequenced. (A) Plasma GAPDH. (B) Plasma RMRP. (C) Gastric juice GAPDH. (D) Gastric RMRP.

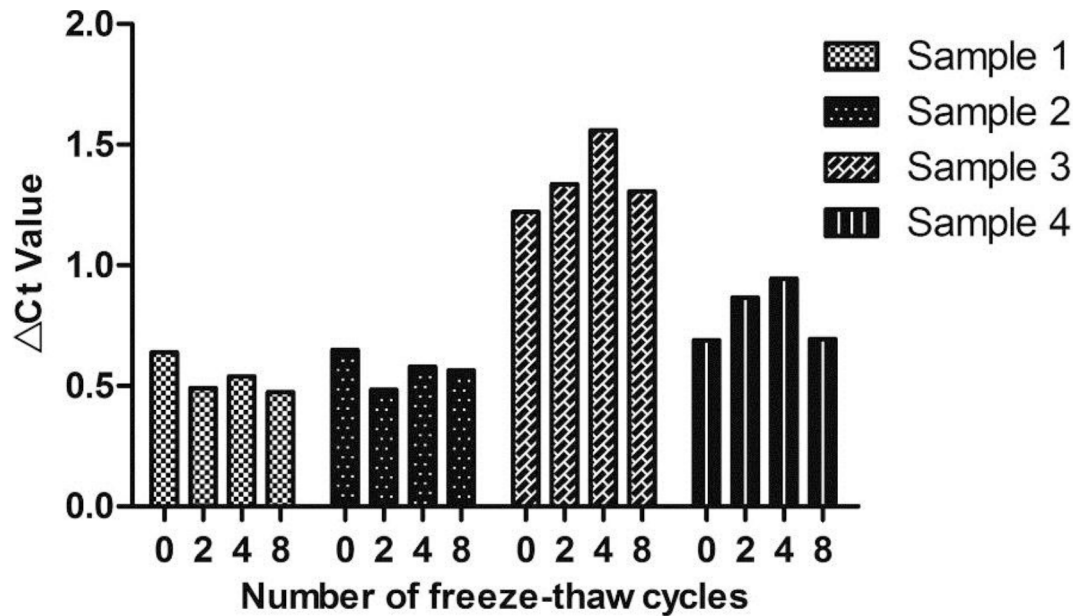

**Supplementary Figure S2: Results of freeze-thaw experiments confirmed the stability of body fluid RMRP.** Four blood samples were randomly selected and then equally divided to four parts. After 0, 2, 4, and 8 cycles of freeze-thaw, the RMRP levels were detected by qRT-PCR. Three independent experiments were performed.  $P > 0.05$ .

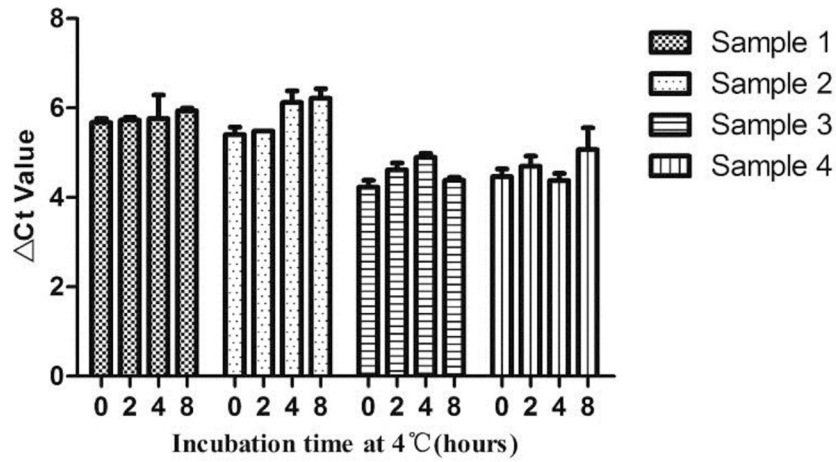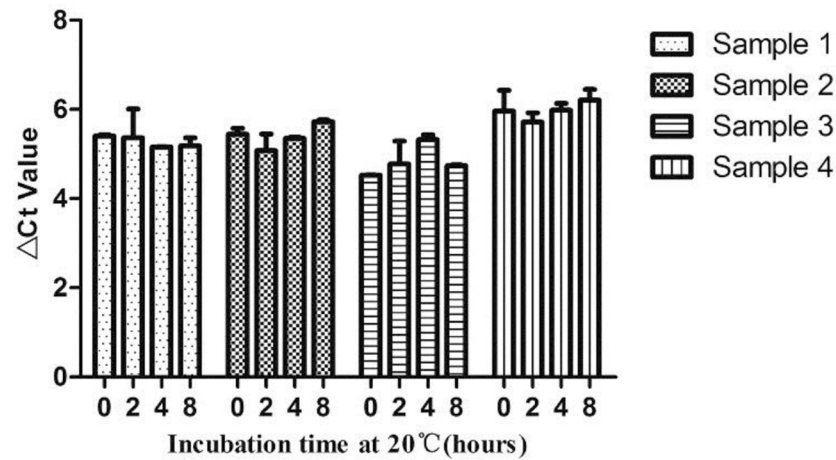

**Supplementary Figure S3: Results of incubation experiments under different times and temperatures confirmed the stability of body fluid RMRP.** Four blood samples were randomly selected and then equally divided to eight parts. Four of them were put at 4°C. Others were stored at 20°C. After 0, 2, 4, and 8 hour incubation, the RMRP levels were detected by qRT-PCR. Three independent experiments were performed.  $P > 0.05$ .

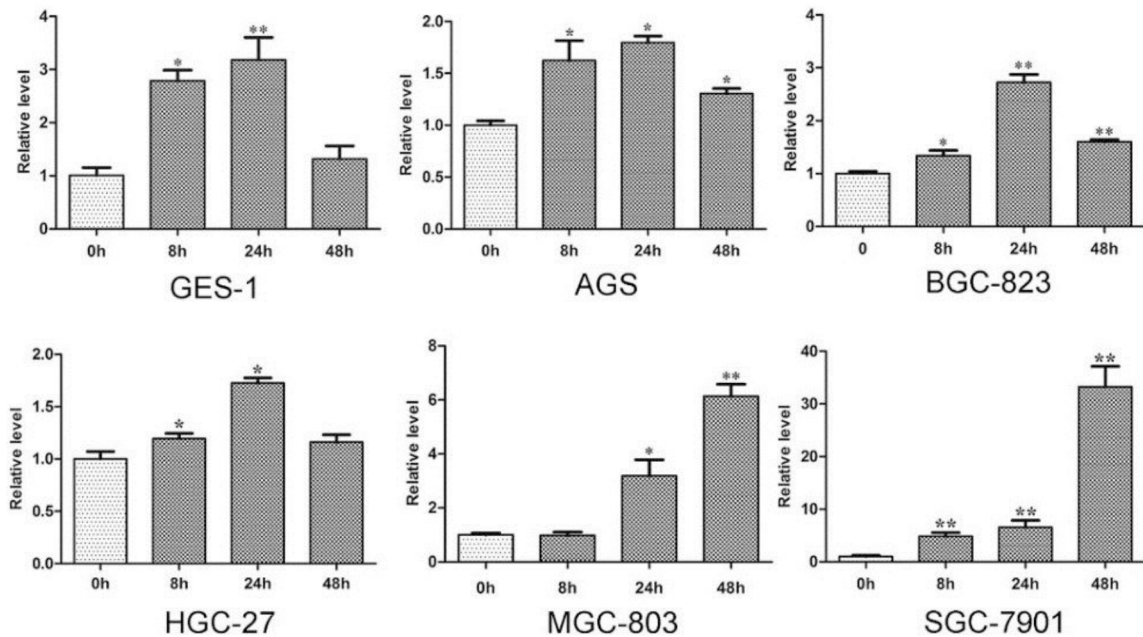

**Supplementary Figure S4: Gastric cell culture experiments explored the source of RMRP in body fluid.** Normal human gastric mucosa epithelial cell line GES-1 and gastric cancer cell lines AGS, BGC-823, HGC-27, MGC-803 and SGC-7901 were cultured in serum free medium. qRT-PCR was used to detect RMRP levels in medium after 0, 8, 24, and 48 h incubation. Three independent experiments were performed. \* $P < 0.05$ , \*\* $P < 0.01$ .

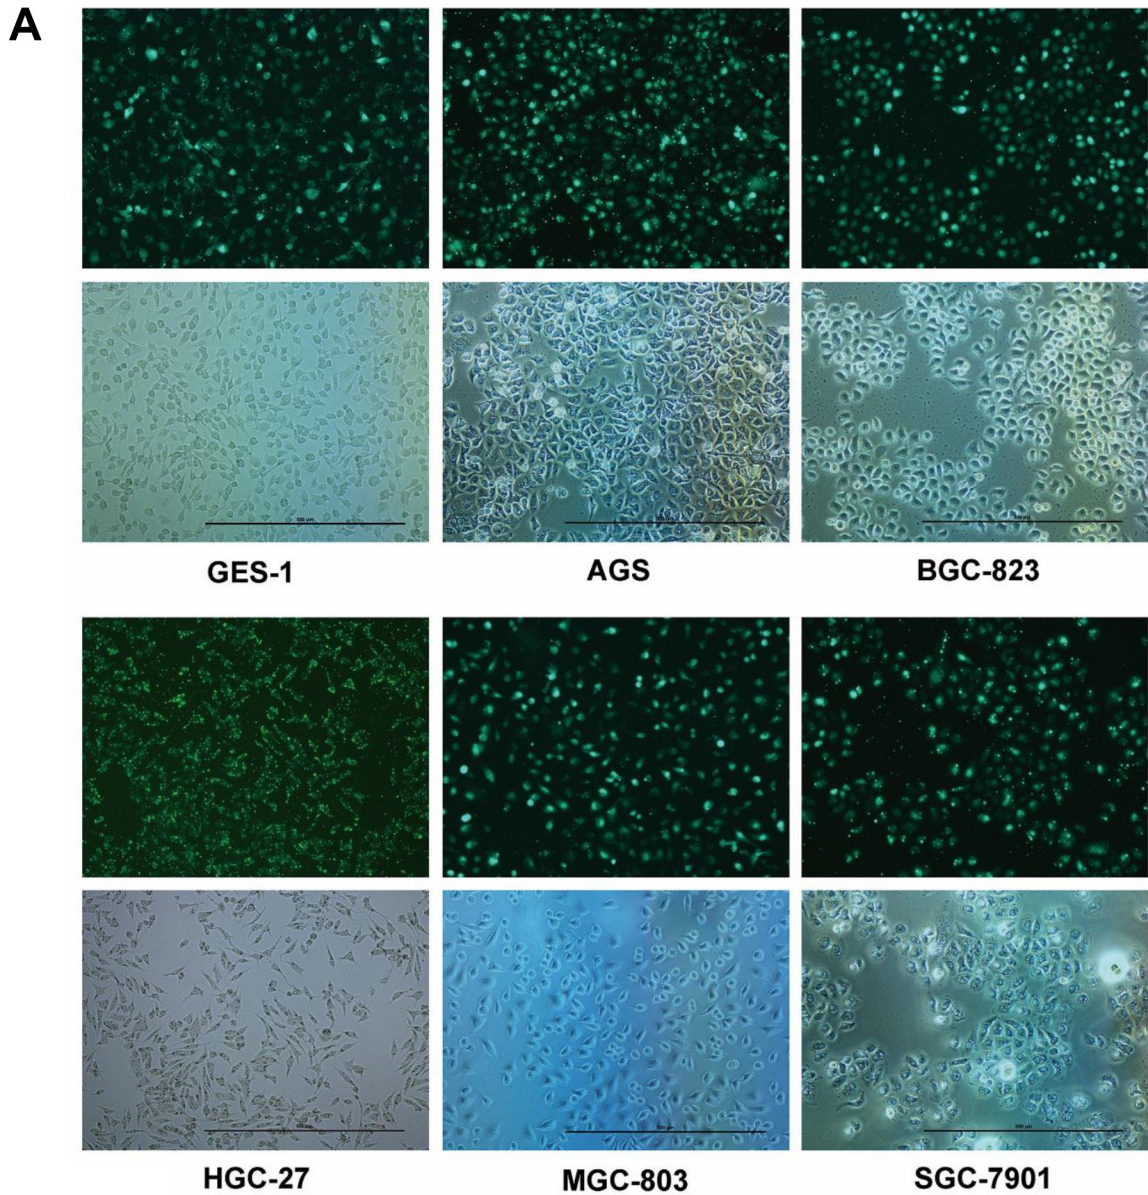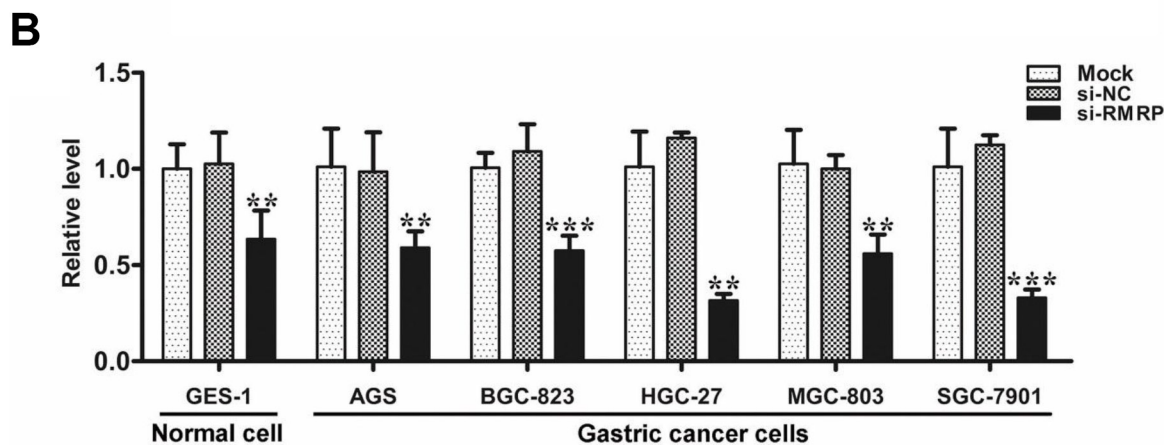

**Supplementary Figure S5: Knockdown RMRP expression in gastric cells.** (A) si-RMRP was transfected into normal human gastric mucosa epithelial cell line GES-1 and gastric cancer cell lines AGS, BGC-823, HGC-27, MGC-803 and SGC-7901. Up panel, fluorescence microscopic image; down panel, light microscopic image. Scale bars, 500  $\mu$ m. (B) qRT-PCR was used to detect RMRP levels. Data are presented as mean  $\pm$  SD,  $n = 3$ . \* $P < 0.05$ , \*\* $P < 0.01$ , \*\*\* $P < 0.001$ .

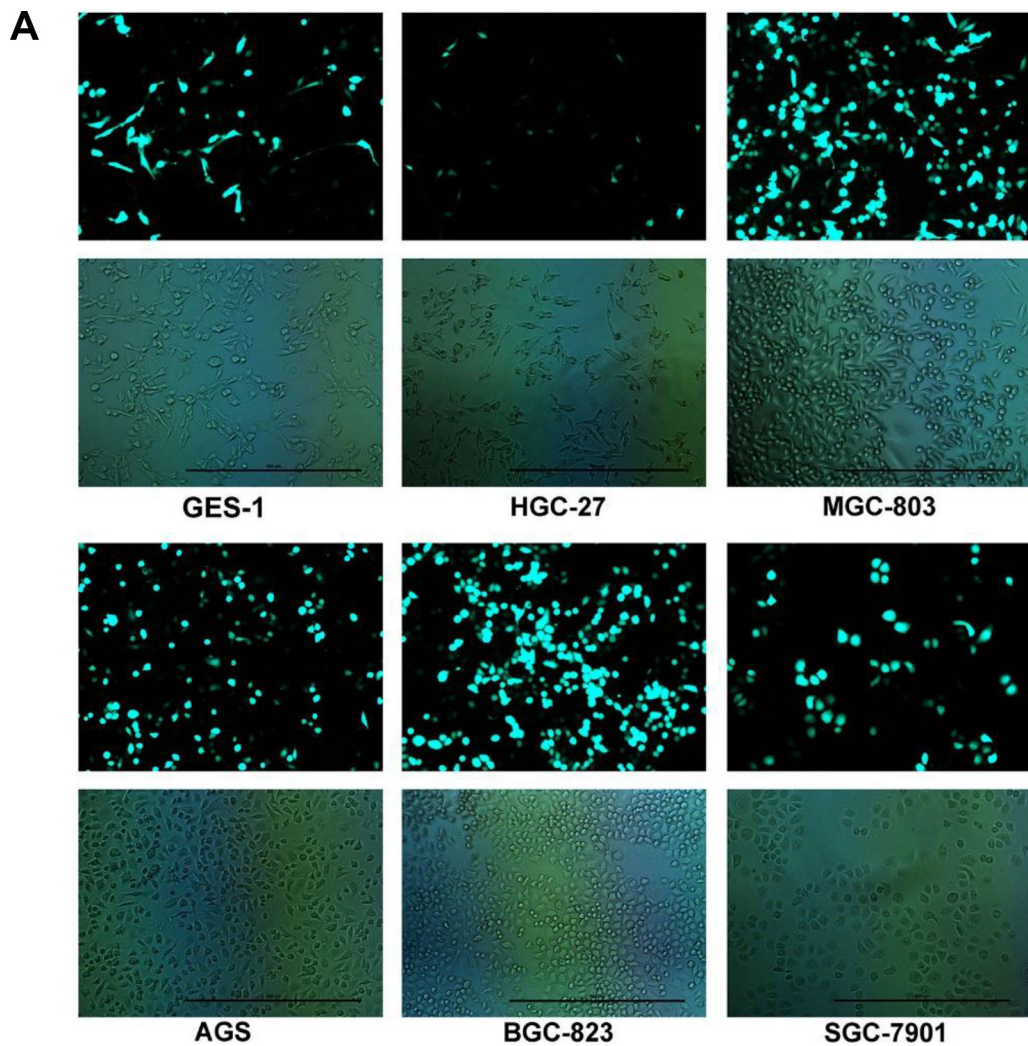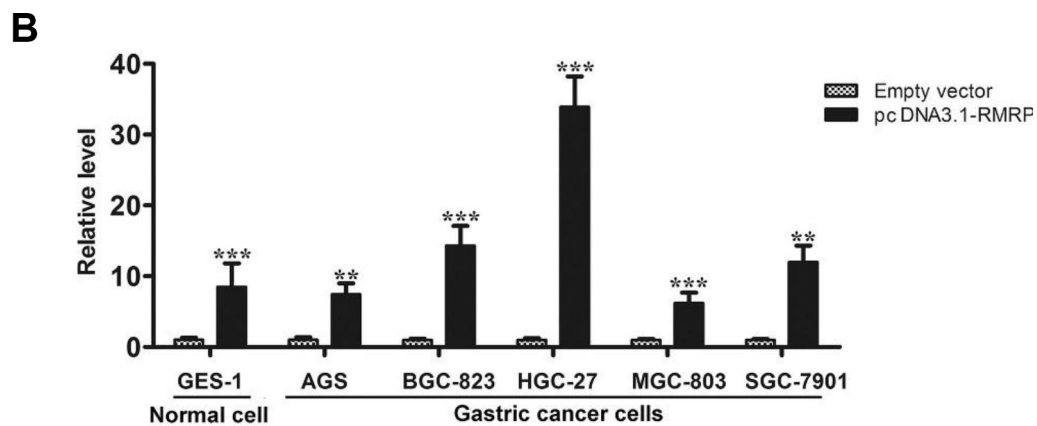

**Supplementary Figure S6: Overexpression RMRP in in gastric cells.** (A) pcDNA3.1-RMRP vector was transfected into normal human gastric mucosa epithelial cell line GES-1 and gastric cancer cell lines HGC-27, MGC-803, AGS, BGC-823 and SGC-7901. Up panel, fluorescence microscopic image; down panel, light microscopic image. Scale bars, 500  $\mu$ m. (B) RMRP expression level was significantly increased in pcDNA3.1-RMRP-transfected groups compared with the empty vector control. Data are presented as the mean  $\pm$  SD,  $n = 3$ . \*\* $P < 0.01$ , \*\*\* $P < 0.001$ .

RTCA curve

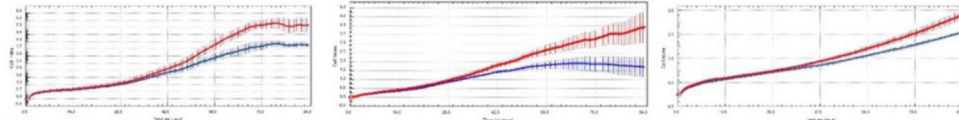

Cell growth curve

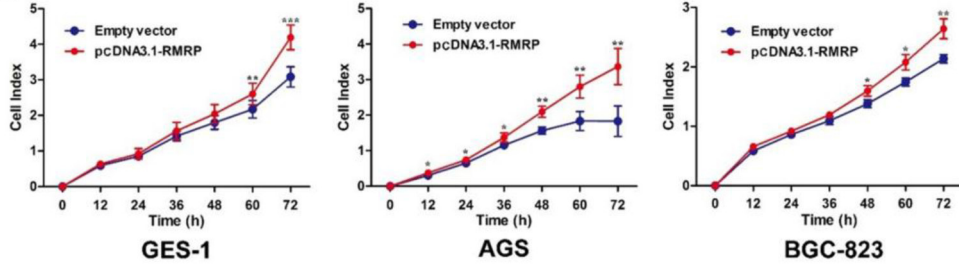

RTCA curve

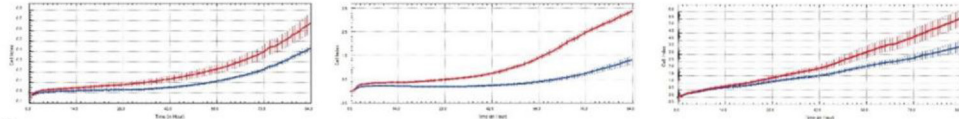

Cell growth curve

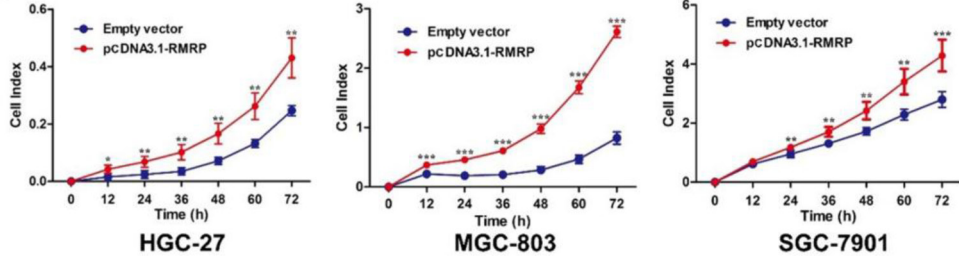

Supplementary Figure S7: Cell proliferation of normal human gastric mucosa epithelial cell line GES-1 and gastric cancer cell lines AGS, BGC-823, HGC-27, MGC-803 and SGC-7901 was increased in pcDNA3.1-RMRP transfected groups compared with respective controls. Data are presented as the mean  $\pm$  SD,  $n = 16$ . \* $P < 0.05$ , \*\* $P < 0.01$ , \*\*\* $P < 0.001$ .

RTCA curve

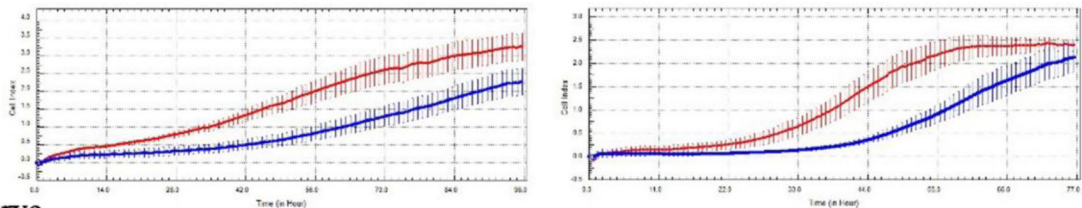

Cell growth curve

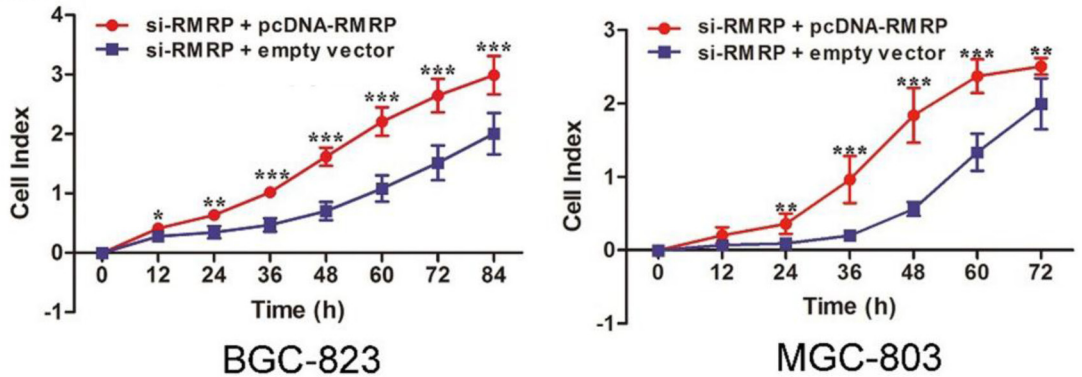

Supplementary Figure S8: Rescue experiments of cell proliferation about RMRP in BGC-823 and MGC-803. Rescue experiments demonstrated that overexpression of RMRP following by knockdown RMRP restored cell proliferation. Data are presented as the mean  $\pm$  SD,  $n = 16$ . \* $P < 0.05$ , \*\* $P < 0.01$ , \*\*\* $P < 0.001$ .

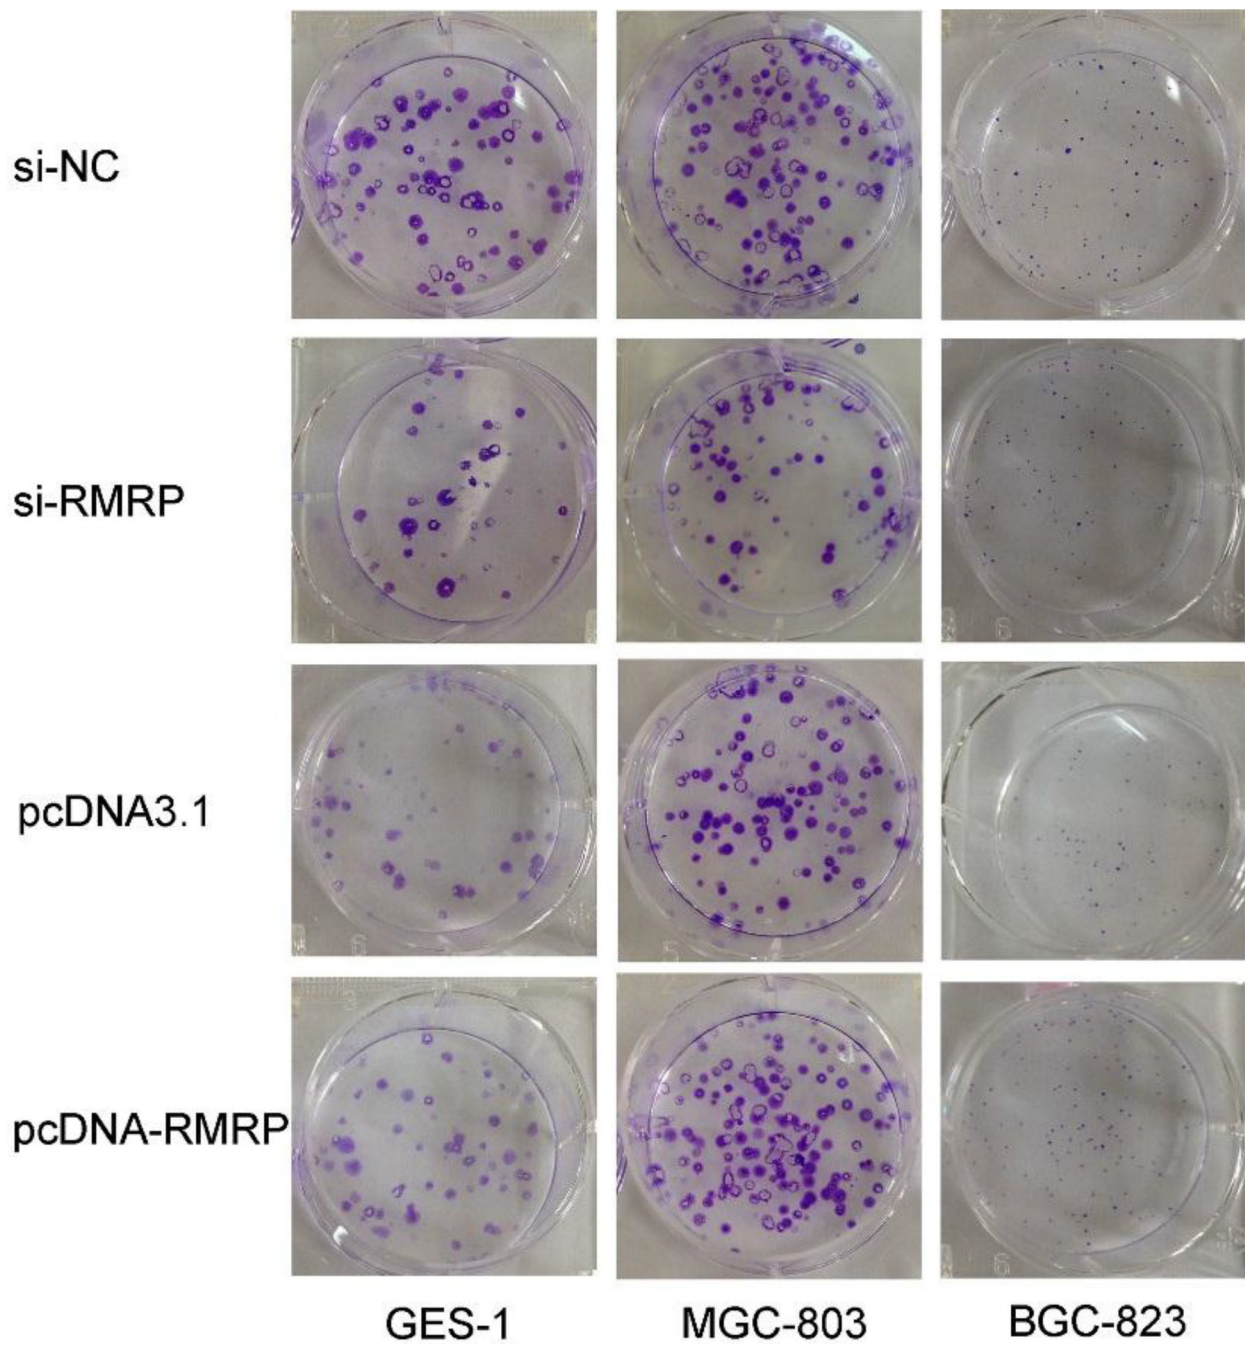

**Supplementary Figure S9: Plate colony formation assays.** Normal human gastric mucosa epithelial cell line GES-1 and gastric cancer cell lines MGC-803 and BGC-823 were transfected with si-negative control (si-NC), si-RMRP, pcDNA3.1 or pcDNA-RMRP. Two weeks later, the colonies were fixed with 4% paraformaldehyde and then stained by crystal violet staining solution. A representative results are showed.

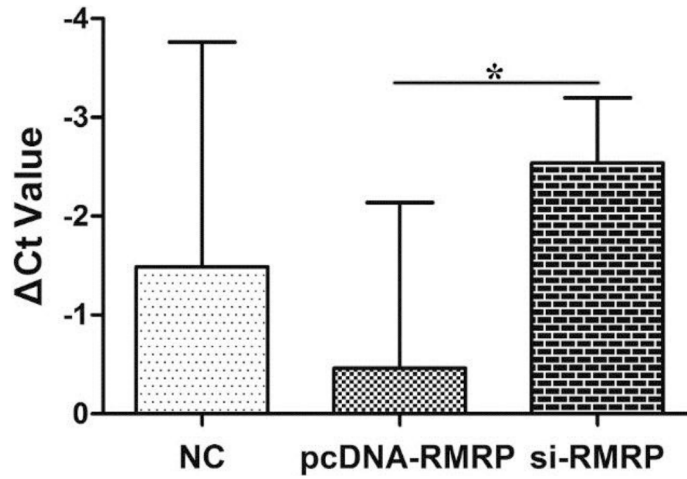

**Supplementary Figure S10: RMRP levels in xenograft mice plasma.** Male BALB/c nude mice were subcutaneously injected with Matrigel (negative control, NC) or MGC-803 cells transfected with pcDNA-RMRP or si-RMRP. Four weeks later, mice were euthanized and their blood was collected. qRT-PCR was used to detect RMRP levels. Smaller  $\Delta C_t$  values indicate higher expression. Data are presented as the mean  $\pm$  SD,  $n = 14$ . \* $P < 0.05$ .

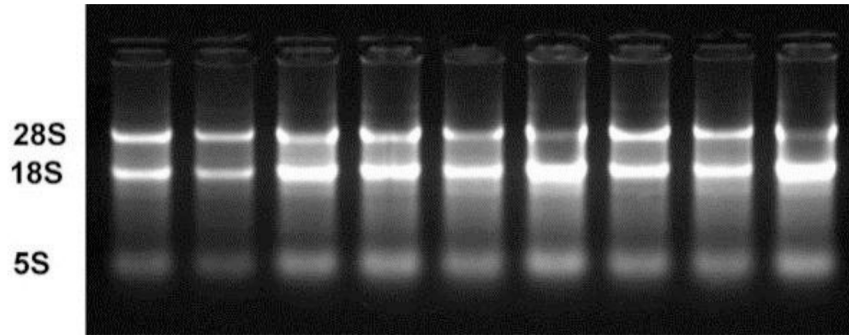

**Supplementary Figure S11: Agarose gel electrophoresis of total RNA.**

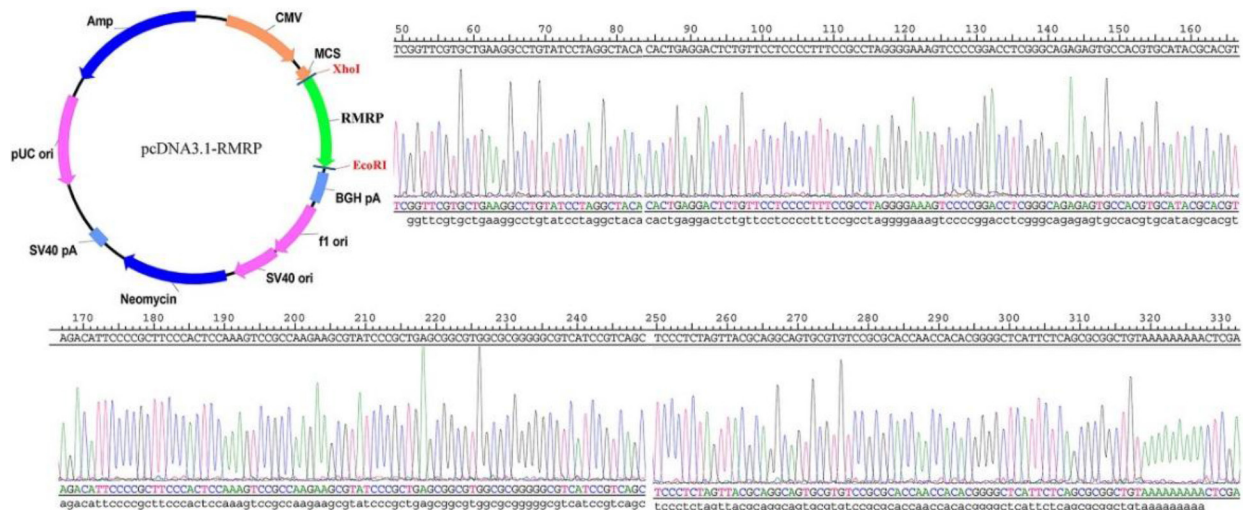

**Supplementary Figure S12: pcDNA3.1-RMRP expression vector construct.** RMRP was synthesized and subcloned into pcDNA3.1 (+) vector with incorporate external *EcoRI* and *XhoI* sites. DNA sequencing was performed to confirm RMRP sequence.

**Supplementary Table S1: Relationship of RMRP expression levels ( $\Delta C_t$ ) in cancer tissues with clinicopathological factors of patients with gastric cancer**

| Characteristics                   | No. of case (%) | Mean $\pm$ SD      | <i>P</i> value |
|-----------------------------------|-----------------|--------------------|----------------|
| Age (y)                           |                 |                    |                |
| $\geq 60$                         | 88 (67)         | -1.446 $\pm$ 1.263 | 0.947          |
| $< 60$                            | 44 (33)         | -1.462 $\pm$ 1.436 |                |
| Gender                            |                 |                    |                |
| Male                              | 91 (69)         | -1.482 $\pm$ 1.316 | 0.695          |
| Female                            | 41 (31)         | -1.384 $\pm$ 1.335 |                |
| Tumor location                    |                 |                    |                |
| Sinuses ventriculi                | 66 (50)         | -1.285 $\pm$ 1.406 | 0.275          |
| Cardia                            | 19 (14)         | -1.562 $\pm$ 1.075 |                |
| Corpora ventriculi                | 31 (23)         | -1.823 $\pm$ 1.304 |                |
| Others                            | 16 (13)         | -1.289 $\pm$ 1.166 |                |
| Diameter (cm)                     |                 |                    |                |
| $\geq 5$                          | 65 (49)         | -1.546 $\pm$ 1.230 | 0.421          |
| $< 5$                             | 67 (51)         | -1.360 $\pm$ 1.400 |                |
| Differentiation                   |                 |                    |                |
| Well                              | 12 (9)          | -1.748 $\pm$ 1.233 | 0.682          |
| Moderate                          | 65 (49)         | -1.386 $\pm$ 1.229 |                |
| Poor                              | 55 (42)         | -1.465 $\pm$ 1.444 |                |
| Pathologic stage                  |                 |                    |                |
| Early                             | 31 (23)         | -1.243 $\pm$ 1.359 | 0.316          |
| Advanced                          | 101 (77)        | -1.515 $\pm$ 1.305 |                |
| Borrmann type                     |                 |                    |                |
| I and II                          | 20 (20)         | -0.738 $\pm$ 1.288 | 0.002          |
| III and IV                        | 81 (80)         | -1.707 $\pm$ 1.243 |                |
| Pathologic diagnosis              |                 |                    |                |
| Signet ring cell cancer           | 18 (14)         | -1.231 $\pm$ 1.825 | 0.575          |
| Adenocarcinoma                    | 114 (86)        | -1.486 $\pm$ 1.226 |                |
| Invasion                          |                 |                    |                |
| T <sub>1</sub> and T <sub>2</sub> | 48 (36)         | -1.168 $\pm$ 1.401 | 0.037          |
| T <sub>3</sub> and T <sub>4</sub> | 84 (64)         | -1.654 $\pm$ 1.186 |                |
| Lymphatic metastasis              |                 |                    |                |
| N <sub>0</sub>                    | 54 (41)         | -1.115 $\pm$ 1.247 | 0.014          |
| N <sub>1-3</sub>                  | 78 (59)         | -1.684 $\pm$ 1.323 |                |
| Distal metastasis                 |                 |                    |                |
| M <sub>0</sub>                    | 17 (13)         | -1.792 $\pm$ 1.344 | 0.255          |
| M <sub>1</sub>                    | 115 (87)        | -1.401 $\pm$ 1.312 |                |
| Venous invasion                   |                 |                    |                |
| Absent                            | 69 (52)         | -1.292 $\pm$ 1.298 | 0.146          |
| Present                           | 63 (48)         | -1.626 $\pm$ 1.327 |                |
| Perineural invasion               |                 |                    |                |
| Absent                            | 64 (48)         | -1.142 $\pm$ 1.373 | 0.008          |
| Present                           | 68 (52)         | -1.743 $\pm$ 1.202 |                |
| CEA (Tissue)                      |                 |                    |                |
| Positive                          | 100 (76)        | -1.739 $\pm$ 1.114 | $< .001$       |
| Negative                          | 32 (24)         | -0.552 $\pm$ 1.507 |                |



|                 |         |                |       |
|-----------------|---------|----------------|-------|
| CA19-9 (Tissue) |         |                |       |
| Positive        | 69 (52) | -1.778 ± 1.204 | 0.003 |
| Negative        | 63 (48) | -1.094 ± 1.352 |       |

Note: Smaller  $\Delta C_i$  values indicate higher expression.

**Supplementary Table S2: Relationship of RMRP levels ( $\Delta C_i$ ) in plasma before surgery with clinicopathological factors of patients with gastric cancer**

| Characteristics                 | No. of case (%) | Mean ± SD      | P value |
|---------------------------------|-----------------|----------------|---------|
| <b>Age (y)</b>                  |                 |                |         |
| ≥ 60                            | 55 (66)         | -0.096 ± 2.128 | 0.196   |
| < 60                            | 28 (34)         | -0.668 ± 1.296 |         |
| <b>Gender</b>                   |                 |                |         |
| Male                            | 58 (70)         | -0.480 ± 1.642 | 0.163   |
| Female                          | 25 (30)         | 0.156 ± 2.375  |         |
| <b>Tumor location</b>           |                 |                |         |
| Sinuses ventriculi              | 42 (51)         | 0.007 ± 2.182  | 0.359   |
| Cardia                          | 11 (13)         | -0.399 ± 0.993 |         |
| Corpora ventriculi              | 17 (20)         | -0.972 ± 1.310 |         |
| Others                          | 13 (16)         | -0.255 ± 2.076 |         |
| <b>Diameter (cm)</b>            |                 |                |         |
| ≥ 5                             | 42 (51)         | 0.044 ± 2.133  | 0.031   |
| < 5                             | 41 (49)         | -0.629 ± 1.582 |         |
| <b>Differentiation</b>          |                 |                |         |
| Well                            | 7 (8)           | -0.363 ± 2.220 | 0.661   |
| Moderate                        | 39 (48)         | -0.093 ± 2.136 |         |
| Poor                            | 37 (44)         | -0.491 ± 1.563 |         |
| <b>Pathologic stage</b>         |                 |                |         |
| Early                           | 21 (25)         | -1.030 ± 1.215 | 0.038   |
| Advanced                        | 62 (75)         | -0.038 ± 2.029 |         |
| <b>Borrmann type</b>            |                 |                |         |
| I & II                          | 15 (24)         | 0.289 ± 1.625  | 0.478   |
| III & IV                        | 47 (76)         | -0.142 ± 2.147 |         |
| <b>Pathologic diagnosis</b>     |                 |                |         |
| Signet ring cell cancer         | 13 (16)         | -0.694 ± 1.349 | 0.406   |
| Adenocarcinoma                  | 70 (84)         | -0.213 ± 1.984 |         |
| <b>Invasion</b>                 |                 |                |         |
| T <sub>1</sub> & T <sub>2</sub> | 29 (35)         | -0.876 ± 1.254 | 0.017   |
| T <sub>3</sub> & T <sub>4</sub> | 54 (65)         | 0.027 ± 2.113  |         |
| <b>Lymphatic metastasis</b>     |                 |                |         |
| N <sub>0</sub>                  | 35 (42)         | -0.559 ± 1.399 | 0.272   |
| N <sub>1-3</sub>                | 48 (58)         | -0.092 ± 2.189 |         |
| <b>Distal metastasis</b>        |                 |                |         |
| M <sub>0</sub>                  | 71 (86)         | -0.294 ± 1.903 | 0.954   |
| M <sub>1</sub>                  | 12 (14)         | -0.259 ± 1.964 |         |
| <b>Venous invasion</b>          |                 |                |         |
| Absent                          | 48 (58)         | -0.556 ± 1.889 | 0.134   |
| Present                         | 35 (42)         | 0.078 ± 1.866  |         |

|                     |         |                    |       |
|---------------------|---------|--------------------|-------|
| Perineural invasion |         |                    |       |
| Absent              | 41 (49) | $-0.376 \pm 2.015$ | 0.682 |
| Present             | 42 (51) | $-0.204 \pm 1.801$ |       |
| CEA(Tissue)         |         |                    |       |
| Positive            | 57 (69) | $-0.589 \pm 1.733$ | 0.032 |
| Negative            | 26 (31) | $0.372 \pm 2.110$  |       |
| CA19-9(Tissue)      |         |                    |       |
| Positive            | 34 (41) | $-0.348 \pm 2.392$ | 0.815 |
| Negative            | 49 (59) | $-0.248 \pm 1.493$ |       |

Note: Smaller  $\Delta C_i$  value indicates higher RMRP level.

**Supplementary Table S3: Relationship of RMRP level changes ( $\Delta\Delta C_i$ ) in plasma after surgery with clinicopathological factors of patients with gastric cancer**

| Characteristics                 | No. of case (%) | Mean $\pm$ SD      | P value |
|---------------------------------|-----------------|--------------------|---------|
| Age (y)                         |                 |                    |         |
| $\geq 60$                       | 55 (66)         | $-0.513 \pm 2.803$ | 0.080   |
| $< 60$                          | 28 (34)         | $-1.374 \pm 1.619$ |         |
| Gender                          |                 |                    |         |
| Male                            | 58 (70)         | $-0.588 \pm 2.553$ | 0.218   |
| Female                          | 25 (30)         | $-1.335 \pm 2.297$ |         |
| Tumor location                  |                 |                    |         |
| Sinuses ventriculi              | 42 (51)         | $-0.791 \pm 2.033$ | 0.110   |
| Cardia                          | 11 (13)         | $0.211 \pm 4.036$  |         |
| Corpora ventriculi              | 17 (20)         | $-1.932 \pm 1.786$ |         |
| Others                          | 13 (16)         | $-0.305 \pm 2.516$ |         |
| Diameter (cm)                   |                 |                    |         |
| $\geq 5$                        | 42 (51)         | $-0.876 \pm 2.204$ | 0.786   |
| $< 5$                           | 41 (49)         | $-0.726 \pm 2.793$ |         |
| Differentiation                 |                 |                    |         |
| Well                            | 7 (8)           | $-1.321 \pm 3.123$ | 0.762   |
| Moderate                        | 39 (48)         | $-0.888 \pm 2.722$ |         |
| Poor                            | 37 (44)         | $-0.617 \pm 2.142$ |         |
| Pathologic stage                |                 |                    |         |
| Early                           | 21 (25)         | $-1.598 \pm 1.958$ | 0.091   |
| Advanced                        | 62 (75)         | $-0.535 \pm 2.607$ |         |
| Borrmann type                   |                 |                    |         |
| I & II                          | 15 (24)         | $0.373 \pm 3.885$  | 0.268   |
| III & IV                        | 47 (76)         | $-0.825 \pm 2.015$ |         |
| Pathologic diagnosis            |                 |                    |         |
| Signet ring cell cancer         | 13 (16)         | $-1.450 \pm 1.669$ | 0.311   |
| Adenocarcinoma                  | 70 (84)         | $-0.684 \pm 2.607$ |         |
| Invasion                        |                 |                    |         |
| T <sub>1</sub> & T <sub>2</sub> | 29 (35)         | $-1.080 \pm 2.960$ | 0.462   |
| T <sub>3</sub> & T <sub>4</sub> | 54 (65)         | $-0.655 \pm 2.215$ |         |

|                                                                 |         |                |       |
|-----------------------------------------------------------------|---------|----------------|-------|
| Lymphatic metastasis                                            |         |                |       |
| N <sub>0</sub>                                                  | 35 (42) | -1.387 ± 2.215 | 0.040 |
| N <sub>1-3</sub>                                                | 48 (58) | -0.244 ± 2.631 |       |
| Distal metastasis                                               |         |                |       |
| M <sub>0</sub>                                                  | 71 (86) | -0.787 ± 2.481 | 0.878 |
| M <sub>1</sub>                                                  | 12 (14) | -0.912 ± 2.676 |       |
| Venous invasion                                                 |         |                |       |
| Absent                                                          | 48 (58) | -0.800 ± 2.485 | 0.989 |
| Present                                                         | 35 (42) | -0.808 ± 2.537 |       |
| Perineural invasion                                             |         |                |       |
| Absent                                                          | 41 (49) | -1.044 ± 3.007 | 0.389 |
| Present                                                         | 42 (51) | -0.569 ± 1.864 |       |
| CEA(Tissue)                                                     |         |                |       |
| Positive                                                        | 57 (69) | -1.166 ± 2.106 | 0.049 |
| Negative                                                        | 26 (31) | -0.009 ± 3.076 |       |
| CA19-9(Tissue)                                                  |         |                |       |
| Positive                                                        | 34 (41) | -0.708 ± 3.030 | 0.778 |
| Negative                                                        | 49 (59) | -0.867 ± 2.092 |       |
| Note: Smaller $\Delta\Delta C_1$ value indicates larger change. |         |                |       |
